# Supplementary material for: Expression Analysis of Hairpin RNA CarryingSugarcane mosaic virus(SCMV) Derived Sequences and Transgenic Resistance Development in a Model Rice Plant
Source: Hindawi journal article supplement (doi:10.1155/2017/1646140), 2017-01-01
Supplement: f1 [file 1646140.f1.pdf]

**Supplementary data:**

*KpnI* *XhoI* *BamHI*
D A G

CGGggtacc TCGAg gatcc AGTTTGATAGATGGTATGATGCCGGTAAGAAGGAATACGAAAT  
 TGATGACACACAAATGACAGTTGTCATGAGTGGTCCTATGGTATGGTGCATTGAAAATGGT  
 AGCTCACCAAACATAAACGGAAATTGGACAATGATGGATGGAGATGAACAAAGGGTTTTT  
 CCACTCAAACCGGTCATTGAAAATGCATCTCCAACCTTCCGACAAATTATGCATCATTTTA  
 GTGATGCAGCTGAAGAGAATGGCATTGTTAGAAATACTATTTCACTC

K I T C

AACTTTTAAAATCACATGCAAAAACGTGTAATATTGACGATCTGGAATTATCAGATGATGAA  
 TTTGGGGCCAAGTTATATAGCAATCTGCAGCGTATTGAAGAAAAGCAACGTGAATATCTTG  
 CTAAAGATCAAAAACCTTCTACGCATGATACTTCGTAAAGGATCGGTGTAACCCAAAATT  
 TTCACATTTGCCTCTACTATGGCAAcccggg AAGCTTactagtGGTACC CGC

*SmaI* *HindIII* *SpeI* *KpnI*

**Figure S1:** Sequence of coat protein (CP) (In Red) and Helper component proteinase (Hc-Pro) (In Blue) containing the conserved motifs of both genes fused together. Multiple unique restriction sites were added in the start and end of fused sequence. Respective sequence was synthesized from GeneArt™ Gene Synthesis for further cloning into Hairpin vector.

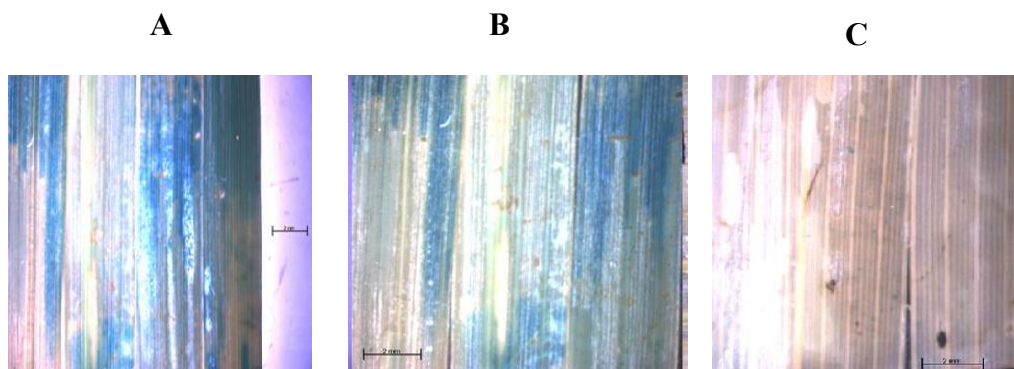

**Figure S2:** GUS expression assay in the Ubi-hpCP:Hc-Pro transgenic rice leaves. In the representative images, leaves of the rice plants transformed with the empty vector control (A, B) and those transformed with Ubi-hpCP:Hc-Pro (line #3) (C) were bombarded with 35S-GUS:CP:Hc-Pro fusion construct, and stained with X-Gluc. Prominent GUS expression (blue spots) was detected in the empty vector control leaves but GUS expression was hardly discernable in the leaves derived from rice plants transformed with Ubi-hpCP:Hc-Pro, indicating that GUS silencing was induced by the Ubi-hpCP:Hc-Pro transgene. Scale bar = 2 mm. The experiment was repeated for three times.
